# Supplementary material for: LRR-protein RNH1 dampens the inflammasome activation and is associated with COVID-19 severity
Source: Life Sci Alliance. 2022 Mar 7;5(6):e202101226. doi: 10.26508/lsa.202101226 (PMC8922048; doi:10.26508/lsa.202101226)
Supplement: Supplementary file 2 [file LSA-2021-01226_SdataF2.xlsx]

## Sheet: Sheet1
Figure 2A
	IL-1b (pg/mL)
ctrl-WT	ctrl-RNH1-KO	Nigericin-WT	Nigericin-WT	MSU-WT	MSU-RNH1-KO	Gramicidin A-WT	Gramicidin A-RNH1-KO
0	15.4264	2034.5	4886.9	611.162	2905.04	1573.57	2103.95
0	35.7364	2128.91	5023.18	517.929	3075.58	1468.14	2111.39
0	5.03876	1467.98	4955.43	379.293	2647.36	1147.83	1759.61
Figure 2C
	LDH Release (%)
ctrl-WT	ctrl-RNH1-KO	Nigericin-WT	Nigericin-WT
1.99254	0.54704	24.872	27.0465
0	0.880262	20.1557	30.2038
0.651985	1.3801	17.6989	41.3286
Figure 2E		IL-1b (pg/mL)
ctrl-WT	Ctrl-Rnh1-GFP	Nigericin-Empty	Nigericin-RNH1-GFP	MSU-Empty	MSU-RNH1-GFP	Gramicidin A-Empty	Gramicidin A-RNH1-GFP
198.846	1078.85	27100.4	8571.15	1991.6	1478.78	9300.38	5021.92
361.923	821.923	22126.5	8566.54	2534.42	1303.14	11611.2	3943.46
298.846	905	21792.7	8506.54	2295.71	1226.73	12445	3438.85
Figure 2G
		IL-1b (pg/mL)
Ctrl-empty	Ctrl-Rnh1	Nigericin-Empty	Nigericin-RNH1	MSU-Empty	MSU-RNH1	Gramicidin A-Empty	Gramicidin A-RNH1
0	0	2409.5	1157.2	325.459	173.463	1847.48	1036.65
0	0	4323.99	1353.17	652.982	257.683	2012.61	1265.64
0	0	3731.15	1639.95	475.734	248.876	2468.39	1428.03
Figure 2I
	% Cells with ASC speck
WT	RNH1-KO
6.8	39.1
10	57.6
13	57.7
