# Supplementary material for: LRR-protein RNH1 dampens the inflammasome activation and is associated with COVID-19 severity
Source: Life Sci Alliance. 2022 Mar 7;5(6):e202101226. doi: 10.26508/lsa.202101226 (PMC8922048; doi:10.26508/lsa.202101226)
Supplement: Supplementary file 3 [file LSA-2021-01226_SdataF3.xlsx]

## Sheet: Sheet1
Figure 3 D
		TNF pg/mL
	Ctrl-WT	Ctrl-RNH1-KO	Pam3Cys-WT	Pam3Cys-RNH1-KO
	131.667	0	6355	10961.7
	0	0	5981.67	13321.7
	0	0	6835	11278.3
Figure 3 E
		IL-6 (pg/mL)
	Ctrl-WT	Ctrl-RNH1-KO	Pam3Cys-WT	Pam3Cys-RNH1-KO
	0	0	1323.91	1853.91
	0	0	1236.96	1927.39
	0	0	734.783	1840.87
Figure 3 F
ctrl-WT	ctrl-RNH1-KO	WT-dAdt	RNh1-KO dAdt	WT-Flagellin	RNH1-KO flagellin
0	15.4264	525.354	1559.84	219.343	808.074
0	35.7364	678.434	1604.58	269.04	801.519
0	5.03876	717.879	1498.93	316.566	782.524
