# Supplementary material for: LRR-protein RNH1 dampens the inflammasome activation and is associated with COVID-19 severity
Source: Life Sci Alliance. 2022 Mar 7;5(6):e202101226. doi: 10.26508/lsa.202101226 (PMC8922048; doi:10.26508/lsa.202101226)
Supplement: Supplementary file 4 [file LSA-2021-01226_SdataF4.xlsx]

## Sheet: Sheet1
Figure 4B
	Caspase-1 mRNA expression			ASC mRNA expression
	WT	RNH1-KO		WT	RNH1-KO
	0.000104081	0.000101002		9.06081e-05	5.05008e-05
	0.000110781	0.000125213		5.65544e-05	9.42379e-05
	0.000145167	0.00013053		0.000107008	7.29196e-05
	0.000143831	0.000119007		8.55227e-05	4.50952e-05
	0.000142838	8.65164e-05		0.000119282	5.51352e-05
	0.000109762	0.00011181		5.1562e-05	6.42178e-05
	3.18871e-05	7.25834e-05		3.79204e-05	7.10897e-05
	0.000118185	0.000115486		4.50952e-05	7.30883e-05
	0.000122353	0.000149248		6.64825e-05	6.86681e-05
