# Supplementary material for: LRR-protein RNH1 dampens the inflammasome activation and is associated with COVID-19 severity
Source: Life Sci Alliance. 2022 Mar 7;5(6):e202101226. doi: 10.26508/lsa.202101226 (PMC8922048; doi:10.26508/lsa.202101226)
Supplement: Supplementary file 5 [file LSA-2021-01226_SdataF5.xlsx]

## Sheet: Sheet1
Figure 5D
	Il-1b (pg/mL)
ctrl-WT	ctrl-rnh1-ko	nigericin-WT	nigericin-Rnh1-ko	dadt-WT	dadt-Rnh1-ko	flagelin-WT	flagelin-Rnh1-ko
0	0	1211	2230.6	1784.2	2947.71	359	1110.21
0	0	1490.2	3496.6	1548.2	3801.46	328.2	1150.62
0	0	1513	2440.6	1673.4	2697.29	399	1046.46
Figure 5G
		Cd45.2 donor reconstitution (percentage of PB)
	WT				Rnh1-KO
Gr1+	98.7	99.8	99		97.8	99.8	99.4
CD3+	73.4	37.1	41.3		68.2	40.4	37.8
Cd19+	98.7	93.1	65.8		89.2	89.9	78.1
Figure 5H
	WBC (K/ul)			Neutrophils(K/ul)			Monocytes(K/ul)
	WT	KO		WT	KO		WT	KO
	15.89	13.24		6.9	4.35		0.3	0.59
	13.99	14.67		2.17	3.45		0.22	0.4
	13.93	17.39		4.35	4.65		0.19	0.29
	15.07	15.93		6.04	3.49		0.48	0.26
Figure 5I
	Neutrophils%
	WT-PBS	Rnh1-Ko-PBS	WT-MSU	Rnh1-KO-MSU
	0	28	47	89
	0	1	31	57
	13	0	49	54
			48	61
			48
			44
Figure 5J
		Il-1b (pg/mL)
	WT-PBS	Rnh1-Ko-PBS	WT-MSU	Rnh1-KO-MSU
	0	0	3.84069	27.1642
	0	0	5.17892	29.7966
	0	0	1.67892	18.9436
			2.42892	13.6054
			4.19363
			2.06127
Figure 5K
	Days	WT	Rnh1-KO
	1	0	1
	2	0	1
	3	0	1
	3	0	1
	4	0
	5	0
