# Supplementary material for: LRR-protein RNH1 dampens the inflammasome activation and is associated with COVID-19 severity
Source: Life Sci Alliance. 2022 Mar 7;5(6):e202101226. doi: 10.26508/lsa.202101226 (PMC8922048; doi:10.26508/lsa.202101226)
Supplement: Supplementary file 7 [file LSA-2021-01226_SdataF6.xlsx]

## Sheet: Sheet1
Figure 6B
	RNH1/GAPDH protein relative expression level
	Normal-ward	ICU-ward
	0.445695	0.348914
	1.08777	0.241737
	0.90058	0.28192
	0.712218	0.363662
	1.08383	1.29142
	0.89591	0.219498
	0.675961	0.946547
	1.18648	0.839406
	1.07839	0.57291
	0.9951	0.436527
	1.34294	0.59029
		0.490114
		0.617081
		0.518596
		1.03805
		0.984337
		1.20793
